# Supplementary material for: Activation of mTORC1 in chondrocytes does not affect proliferation or differentiation, but causes the resting zone of the growth plate to become disordered
Source: PubMed Central journal article supplement (PMC6020113; doi:10.1016/j.bonr.2018.02.006), 2018-02-24
Supplement: mmc1.pdf [file mmc1.pdf]

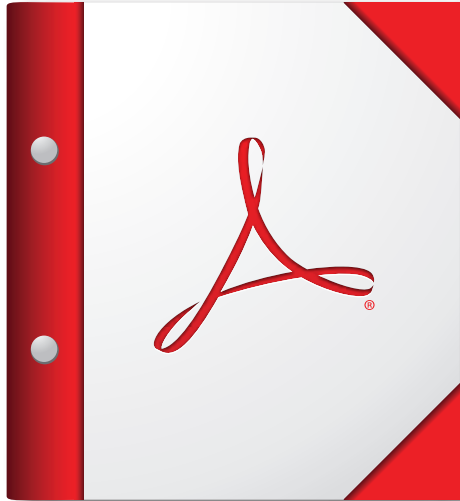

**For the best experience, open this PDF portfolio in  
Acrobat 9 or Adobe Reader 9, or later.**

[Get Adobe Reader Now!](#)
